# Supplementary material
Source: PubMed Central journal article supplement (PMC4116307)
Supplement: NIHMS508049-supplement-1.pdf [file NIHMS508049-supplement-1.pdf]

Figure S1

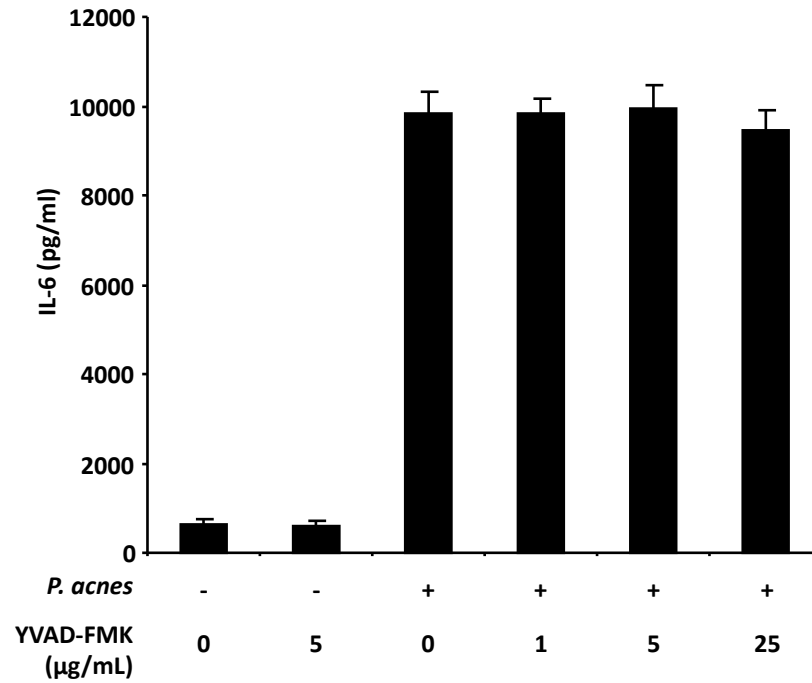

**Fig S1. *P. acnes* induction of IL-6 is not affected by Z-YVAD-FMK in human monocytes.** Cells were treated with Z-YVAD-FMK or Z-WEHD-FMK for 30 minutes prior to stimulation with *P. acnes* (MOI of 0.5). Culture supernatants were collected after 24 hours and assayed with IL-6 ELISA. Data are representative of 3 independent experiments.

Figure S2

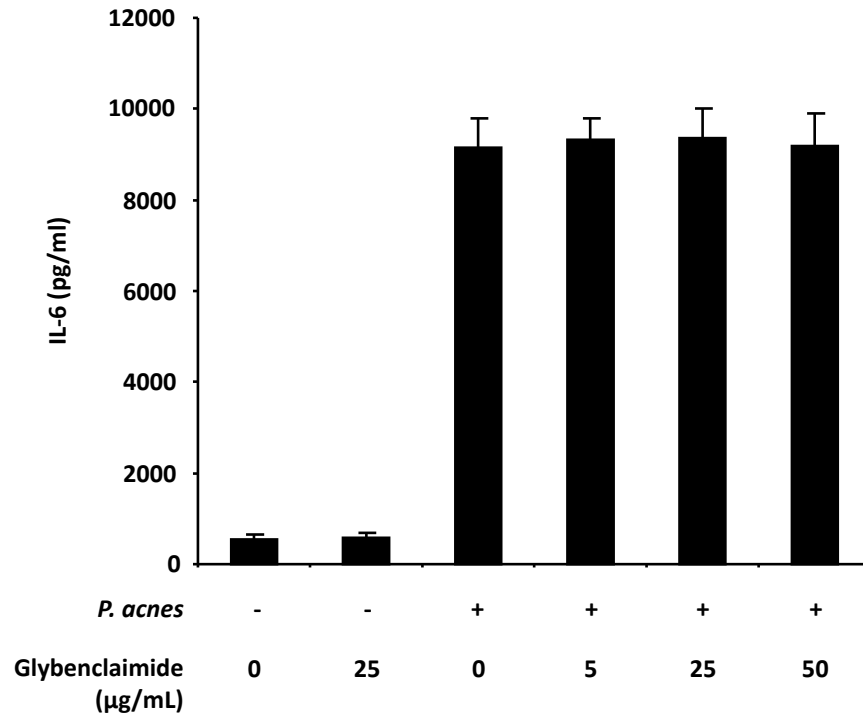

**Fig S2. *P. acnes* induction of IL-6 is not affected by glybenclamide in human monocytes.** Primary human monocytes were treated with glybenclamide (5-50 µg) for 30 minutes, then stimulated with *P. acnes* (MOI of 0.5). Culture supernatants were collected after 24 hours and assayed by IL-1 $\beta$  ELISA. Data are representative of 3 independent experiments.

**Table S1**

| <b>Gene symbol</b>            | <b>Forward primer sequence</b> | <b>Reverse primer sequence</b> | <b>GenBank Accession number</b> |
|-------------------------------|--------------------------------|--------------------------------|---------------------------------|
| <i>GAPDH</i>                  | TGCACCACCAACTGCTTAGC           | GGCATGGACTGTGGTCATGAG          | NM_001256799                    |
| <i>IL-1<math>\beta</math></i> | GCTTGGTGATGTCTGGTC             | GCTGTAGAGTGGGCTTATC            | NM_000576                       |
| <i>Caspase1</i>               | CCACAATGGGCTCTGTTTTT           | CATCTGGCTGCTCAAATGAA           | NM_001257118                    |
| <i>Caspase5</i>               | AAAGAACAACGTGGCTGGAC           | TTGCCCAGGTATTCCAACAT           | NM_004347                       |
| <i>NLRP1</i>                  | AAGACCAGCTGTTCTCGGAGTT         | AGGCATGAGATCTCCTGGTTTC         | NM_033004                       |
| <i>NLRP3</i>                  | CTTCCTTTCCAGTTTGCTGC           | TCTCGCAGTCCACTTCCTTT           | NM_004895                       |
| <i>IPAF</i>                   | CTCTCATGGTGAAGCCAGTCC          | GACAGAGACTTGACTATGTAATCC       | NM_021209                       |
| <i>AIM2</i>                   | GCAGTGATGAAGACCATTCGTA         | GCTGAGTTTGAAGCGTGTTGAT         | NM_004833                       |
